# Supplementary material
Source: Royal Society of Chemistry journal article supplement (doi:10.1039/d6dt00521g)
Supplement: d6dt00521g1.pdf [file d6dt00521g1.pdf]

**Supporting Information For:**

## **Lanthanide Single Molecule Magnets: Relation Between Crystal Packing and Tunnelling Relaxation Time**

Daniel Aravena\*

‡ Departamento de Química de los Materiales, Facultad de Química y Biología, Universidad de Santiago de Chile, Casilla 40, Correo 33, Santiago, Chile

\*email: daniel.aravena.p@usach.cl

**Figure S1.** Experimental and calculated tunnelling relaxation times.....S2

**Table S1.** Experimental and calculated tunnelling time for the 24 molecular systems of the model benchmark set.....S3

**Table S2.** Experimental and calculated tunnelling time for the 24 molecular systems of the model benchmark set.....S4

**\* Calculated tunnelling rates for the complete dataset are available as separate plain text files.**

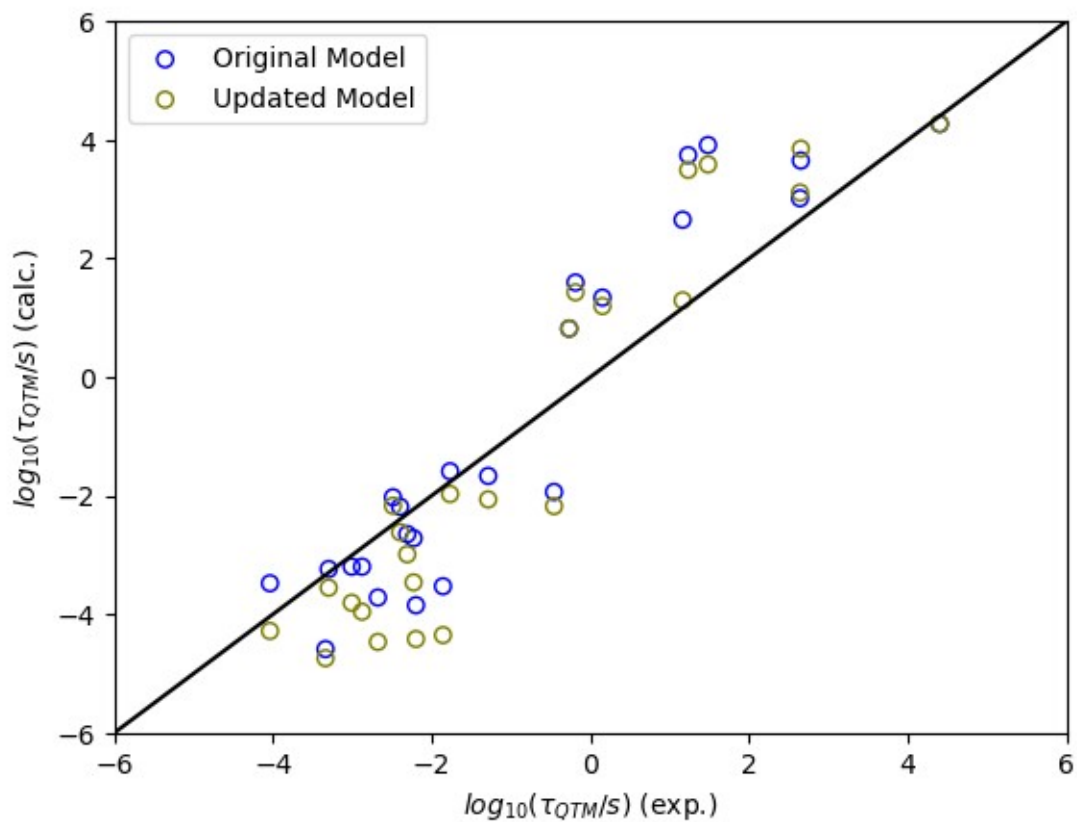

**Figure S1.** Experimental and calculated tunnelling relaxation times for a set of 24 molecular complexes. Blue and green circles correspond to values calculated with the original and updated model of the spin-dipolar model.

**Table S1.** Experimental and calculated tunnelling relaxation time for the 24 molecular systems of the model benchmark set.

| REFCODE  | $\log_{10}(\tau/s)$ |            |           | Reference |
|----------|---------------------|------------|-----------|-----------|
|          | Experimental        | Calculated |           |           |
|          |                     | Old Model  | New Model |           |
| BAJSIQ   | -3.34               | -4.59      | -4.74     | 1         |
| DARTOH   | -2.20               | -3.85      | -4.42     | 2         |
| DARTUN   | -1.86               | -3.53      | -4.35     | 2         |
| EJASIT   | -3.01               | -3.20      | -3.81     | 3         |
| FUMCUN01 | 1.16                | 2.65       | 1.29      | 4         |
| GAQGOX   | -2.31               | -2.65      | -2.99     | 5         |
| GUYRAU   | -2.68               | -3.72      | -4.47     | 6         |
| IMOVAJ   | -0.46               | -1.94      | -2.18     | 7         |
| LIRQUB   | 4.40                | 4.27       | 4.27      | 8         |
| NAFMIT   | 1.48                | 3.91       | 3.58      | 4         |
| OLUJEM   | -4.04               | -3.48      | -4.28     | 9         |
| PAXRIS   | -3.30               | -3.24      | -3.56     | 10        |
| PUKFAF   | -1.77               | -1.59      | -1.98     | 11        |
| QUQKUK   | -1.29               | -1.67      | -2.07     | 12        |
| QUQLEV   | -2.40               | -2.19      | -2.62     | 12        |
| TEKXUF   | -2.49               | -2.03      | -2.17     | 13        |
| TEKYAM   | -0.27               | 0.82       | 0.82      | 13        |
| UCEZUZ   | -2.88               | -3.20      | -3.96     | 14        |
| UCIBAL   | -2.23               | -2.72      | -3.47     | 14        |
| VORCUD   | -0.19               | 1.59       | 1.43      | 15        |
| WIRHAJ   | 2.64                | 3.01       | 3.11      | 16        |
| WIRHEN   | 2.65                | 3.65       | 3.85      | 16        |
| ZAVSOH   | 1.23                | 3.74       | 3.49      | 17        |
| ZIFPIQ   | 0.15                | 1.34       | 1.19      | 18        |

**Table S2.** Selected crystallographic information and calculated tunnelling relaxation times for the ten coordination polymers with the highest positive departure from the expected tunnelling relaxation time. Several repetitions of the system with Refcode DOGFEO13 were cleared from the list as they presented essentially identical parameters.

| CCDC<br>Refcode | Lattice Parameters |       |        |          |         |          | $\log_{10}(\tau)/s$<br>(average) |
|-----------------|--------------------|-------|--------|----------|---------|----------|----------------------------------|
|                 | a                  | b     | c      | $\alpha$ | $\beta$ | $\gamma$ |                                  |
| GAPFIM          | 11.670             | 5.440 | 21.841 | 90       | 90      | 90       | -4.48                            |
| NUCPOS          | 7.671              | 6.820 | 25.658 | 90       | 94.011  | 90       | -3.40                            |
| DOGFEO13        | 5.829              | 5.829 | 19.214 | 90       | 90      | 120      | -4.14                            |
| PEBZAA01        | 6.551              | 6.551 | 18.517 | 90       | 90      | 120      | -4.10                            |
| OLIDUK          | 6.691              | 6.691 | 18.601 | 90       | 90      | 120      | -4.07                            |
| WUYTIV          | 6.669              | 6.669 | 18.371 | 90       | 90      | 120      | -4.09                            |
| POSYIJ          | 6.648              | 6.648 | 19.091 | 90       | 90      | 120      | -4.04                            |
| PICQIF          | 6.568              | 6.568 | 18.640 | 90       | 90      | 120      | -4.09                            |
| NIGROM          | 11.569             | 6.756 | 12.088 | 90       | 103.44  | 90       | -3.80                            |
| NIGRAY          | 11.636             | 6.824 | 12.168 | 90       | 103.76  | 90       | -3.79                            |

## References

- 1 M. Jeletic, P.-H. Lin, J. J. Le Roy, I. Korobkov, S. I. Gorelsky and M. Murugesu, *J. Am. Chem. Soc.*, 2011, **133**, 19286–19289.
- 2 G. Chen, Y. Guo, J. Tian, J. Tang, W. Gu, X. Liu, S. Yan, P. Cheng and D. Liao, *Chemistry – A European Journal*, 2012, **18**, 2484–2487.
- 3 Y.-S. Meng, C.-H. Wang, Y.-Q. Zhang, X.-B. Leng, B.-W. Wang, Y.-F. Chen and S. Gao, *Inorg. Chem. Front.*, 2016, **3**, 828–835.
- 4 Y.-C. Chen, J.-L. Liu, L. Ungur, J. Liu, Q.-W. Li, L.-F. Wang, Z.-P. Ni, L. F. Chibotaru, X.-M. Chen and M.-L. Tong, *J. Am. Chem. Soc.*, 2016, **138**, 2829–2837.
- 5 Y. Kishi, F. Pointillart, B. Lefeuvre, F. Riobé, B. Le Guennic, S. Golhen, O. Cador, O. Maury, H. Fujiwara and L. Ouahab, *Chemical Communications*, 2017, **53**, 3575–3578.
- 6 S. Jiang, B. Wang, G. Su, Z. Wang and S. Gao, *Angew. Chem. Int. Ed.*, 2010, **49**, 7448–7451.
- 7 J. Liu, Y.-C. Chen, J.-L. Liu, V. Vieru, L. Ungur, J.-H. Jia, L. F. Chibotaru, Y. Lan, W. Wernsdorfer, S. Gao, X.-M. Chen and M.-L. Tong, *J. Am. Chem. Soc.*, 2016, **138**, 5441–5450.
- 8 F.-S. Guo, B. M. Day, Y.-C. Chen, M.-L. Tong, A. Mansikkamäki and R. A. Layfield, *Science*, 2018, **362**, 1400–1403.
- 9 E. Lucaccini, M. Briganti, M. Perfetti, L. Vendier, J. Costes, F. Totti, R. Sessoli and L. Sorace, *Chemistry – A European Journal*, 2016, **22**, 5552–5562.
- 10 S.-S. Liu, Y.-S. Meng, Y.-Q. Zhang, Z.-S. Meng, K. Lang, Z.-L. Zhu, C.-F. Shang, B.-W. Wang and S. Gao, *Inorg. Chem.*, 2017, **56**, 7320–7323.
- 11 A. B. Canaj, S. Dey, O. Céspedes, C. Wilson, G. Rajaraman and M. Murrie, *Chemical Communications*, 2020, **56**, 1533–1536.
- 12 W.-B. Sun, P.-F. Yan, S.-D. Jiang, B.-W. Wang, Y.-Q. Zhang, H.-F. Li, P. Chen, Z.-M. Wang and S. Gao, *Chem. Sci.*, 2016, **7**, 684–691.
- 13 H. Zhang, R. Nakanishi, K. Katoh, B. K. Breedlove, Y. Kitagawa and M. Yamashita, *Dalton Transactions*, 2018, **47**, 302–305.
- 14 Y. Bi, Y. Guo, L. Zhao, Y. Guo, S. Lin, S. Jiang, J. Tang, B. Wang and S. Gao, *Chemistry – A European Journal*, 2011, **17**, 12476–12481.
- 15 S. Bala, G.-Z. Huang, Z.-Y. Ruan, S.-G. Wu, Y. Liu, L.-F. Wang, J.-L. Liu and M.-L. Tong, *Chemical Communications*, 2019, **55**, 9939–9942.
- 16 K. Randall McClain, C. A. Gould, K. Chakarawet, S. J. Teat, T. J. Groshens, J. R. Long and B. G. Harvey, *Chem. Sci.*, 2018, **9**, 8492–8503.

- 17 Y. Chen, J. Liu, Y. Lan, Z. Zhong, A. Mansikkamäki, L. Ungur, Q. Li, J. Jia, L. F. Chibotaru, J. Han, W. Wernsdorfer, X. Chen and M. Tong, *Chemistry – A European Journal*, 2017, **23**, 5708–5715.
- 18 Y.-S. Ding, K.-X. Yu, D. Reta, F. Ortu, R. E. P. Winpenny, Y.-Z. Zheng and N. F. Chilton, *Nat. Commun.*, 2018, **9**, 3134.
